# Supplementary material for: Divergent Sapovirus Strains and Infection Prevalence in Wild Carnivores in the Serengeti Ecosystem: A Long-Term Study
Source: PubMed Central journal article supplement (PMC5035092; doi:10.1371/journal.pone.0163548), 2016-09-23
Supplement: pone.0163548.s001.pdf [file pone.0163548.s001.pdf]

## Supporting Information

### Divergent sapovirus strains and infection prevalence in wild carnivores in the Serengeti ecosystem: a long-term study

Ximena A Olarte-Castillo, Heribert Hofer, Katja V Goller, Vito Martella, Patricia D Moehlman, Marion L East

#### S1 Table: Data set for the binary logistic regression model.

| Year | Outbreak | Samp_Type | Contact | Roamer      | Ad_Juv | Clan_Size | Sapovirus_Pcr |
|------|----------|-----------|---------|-------------|--------|-----------|---------------|
| 2003 | outbreak | faeces    | 2_M     | 2_den-bound | cub    | 69        | 0             |
| 2003 | outbreak | faeces    | 1_H     | 1_roaming   | ad     | 81        | 0             |
| 2003 | outbreak | faeces    | 2_M     | 2_den-bound | cub    | 65        | 0             |
| 2003 | outbreak | faeces    | 1_H     | 2_den-bound | cub    | 65        | 0             |
| 2003 | outbreak | faeces    | 2_M     | 1_roaming   | ad     | 65        | 0             |
| 2003 | outbreak | faeces    | 2_M     | 2_den-bound | cub    | 65        | 0             |
| 2003 | outbreak | faeces    | 2_M     | 2_den-bound | cub    | 65        | 0             |
| 2003 | outbreak | faeces    | 2_M     | 2_den-bound | cub    | 65        | 0             |
| 2003 | outbreak | faeces    | 2_M     | 2_den-bound | cub    | 67        | 1             |
| 2003 | outbreak | faeces    | 2_M     | 2_den-bound | cub    | 68        | 1             |
| 2003 | outbreak | spleen    | 1_H     | 2_den-bound | cub    | 81        | 0             |
| 2003 | outbreak | lung      | 2_M     | 1_roaming   | subad  | 81        | 0             |
| 2003 | outbreak | faeces    | 1_H     | 1_roaming   | subad  | 64        | 0             |
| 2003 | outbreak | faeces    | 1_H     | 2_den-bound | cub    | 75        | 1             |
| 2003 | outbreak | faeces    | 2_M     | 1_roaming   | subad  | 75        | 1             |
| 2003 | outbreak | faeces    | 1_H     | 2_den-bound | cub    | 65        | 1             |
| 2003 | outbreak | faeces    | 1_H     | 1_roaming   | subad  | 65        | 1             |
| 2003 | outbreak | faeces    | 2_M     | 1_roaming   | ad     | 71        | 0             |
| 2003 | outbreak | faeces    | 2_M     | 2_den-bound | cub    | 71        | 1             |
| 2003 | outbreak | faeces    | 2_M     | 2_den-bound | cub    | 71        | 1             |
| 2003 | outbreak | faeces    | 2_M     | 2_den-bound | cub    | 65        | 1             |
| 2003 | outbreak | faeces    | 3_L     | 1_roaming   | ad     | 72        | 1             |
| 2003 | outbreak | faeces    | 2_M     | 2_den-bound | cub    | 69        | 0             |
| 2003 | outbreak | faeces    | 1_H     | 1_roaming   | ad     | 74        | 0             |
| 2003 | outbreak | faeces    | 2_M     | 1_roaming   | ad     | 71        | 0             |
| 2003 | outbreak | faeces    | 2_M     | 1_roaming   | ad     | 76        | 0             |
| 2003 | outbreak | faeces    | 1_H     | 2_den-bound | cub    | 76        | 0             |
| 2003 | outbreak | intest    | 1_H     | 2_den-bound | cub    | 67        | 1             |
| 2003 | outbreak | faeces    | 1_H     | 1_roaming   | ad     | 67        | 1             |

|      |              |           |     |             |       |    |   |
|------|--------------|-----------|-----|-------------|-------|----|---|
| 2003 | outbreak     | faeces    | 1_H | 2_den-bound | cub   | 67 | 1 |
| 2003 | outbreak     | faeces    | 1_H | 2_den-bound | cub   | 67 | 1 |
| 2004 | outbreak     | faeces    | 1_H | 2_den-bound | cub   | 66 | 1 |
| 2004 | outbreak     | faeces    | 1_H | 2_den-bound | cub   | 67 | 1 |
| 2004 | outbreak     | faeces    | 2_M | 1_roaming   | ad    | 75 | 0 |
| 2004 | outbreak     | faeces    | 3_L | 1_roaming   | ad    | 67 | 0 |
| 2004 | outbreak     | faeces    | 1_H | 2_den-bound | cub   | 66 | 1 |
| 2004 | outbreak     | faeces    | 2_M | 1_roaming   | subad | 66 | 1 |
| 2004 | outbreak     | faeces    | 1_H | 2_den-bound | cub   | 66 | 1 |
| 2004 | outbreak     | faeces    | 2_M | 2_den-bound | cub   | 66 | 1 |
| 2004 | outbreak     | faeces    | 1_H | 2_den-bound | cub   | 78 | 1 |
| 2004 | outbreak     | faeces    | 2_M | 2_den-bound | cub   | 73 | 1 |
| 2004 | outbreak     | faeces    | 3_L | 1_roaming   | ad    | 73 | 1 |
| 2004 | outbreak     | faeces    | 2_M | 2_den-bound | cub   | 73 | 0 |
| 2004 | outbreak     | faeces    | 1_H | 2_den-bound | cub   | 67 | 1 |
| 2004 | outbreak     | faeces    | 3_L | 1_roaming   | ad    | 71 | 0 |
| 2004 | outbreak     | faeces    | 1_H | 2_den-bound | cub   | 71 | 1 |
| 2004 | outbreak     | faeces    | 2_M | 1_roaming   | ad    | 98 | 1 |
| 2004 | outbreak     | faeces    | 1_H | 2_den-bound | cub   | 73 | 1 |
| 2004 | outbreak     | faeces    | 2_M | 2_den-bound | cub   | 73 | 1 |
| 2004 | outbreak     | faeces    | 2_M | 1_roaming   | ad    | 71 | 0 |
| 2004 | outbreak     | faeces    | 1_H | 2_den-bound | cub   | 73 | 0 |
| 2004 | outbreak     | faeces    | 2_M | 1_roaming   | ad    | 71 | 0 |
| 2004 | outbreak     | faeces    | 1_H | 2_den-bound | cub   | 74 | 1 |
| 2004 | outbreak     | faeces    | 2_M | 2_den-bound | cub   | 67 | 1 |
| 2004 | outbreak     | faeces    | 2_M | 2_den-bound | cub   | 74 | 1 |
| 2004 | outbreak     | lymphNode | 2_M | 2_den-bound | cub   | 74 | 1 |
| 2004 | outbreak     | faeces    | 2_M | 2_den-bound | cub   | 68 | 0 |
| 2004 | outbreak     | faeces    | 1_H | 2_den-bound | cub   | 68 | 1 |
| 2004 | outbreak     | faeces    | 2_M | 2_den-bound | cub   | 69 | 1 |
| 2005 | non-outbreak | faeces    | 1_H | 2_den-bound | cub   | 79 | 1 |
| 2005 | non-outbreak | faeces    | 2_M | 2_den-bound | cub   | 70 | 0 |
| 2005 | non-outbreak | faeces    | 1_H | 2_den-bound | cub   | 69 | 0 |
| 2005 | non-outbreak | faeces    | 2_M | 2_den-bound | cub   | 69 | 0 |
| 2005 | non-outbreak | faeces    | 2_M | 2_den-bound | cub   | 69 | 0 |
| 2005 | non-outbreak | faeces    | 1_H | 1_roaming   | ad    | 66 | 0 |
| 2005 | non-outbreak | faeces    | 1_H | 2_den-bound | cub   | 71 | 1 |
| 2005 | non-outbreak | faeces    | 3_L | 1_roaming   | ad    | 66 | 0 |
| 2005 | non-outbreak | faeces    | 2_M | 2_den-bound | cub   | 66 | 0 |
| 2005 | non-outbreak | faeces    | 1_H | 1_roaming   | subad | 66 | 0 |
| 2005 | non-outbreak | faeces    | 2_M | 1_roaming   | ad    | 74 | 1 |
| 2005 | non-outbreak | faeces    | 3_L | 1_roaming   | ad    | 74 | 0 |
| 2005 | non-outbreak | faeces    | 1_H | 2_den-bound | cub   | 74 | 1 |
| 2005 | non-outbreak | faeces    | 1_H | 1_roaming   | ad    | 75 | 0 |
| 2005 | non-outbreak | faeces    | 1_H | 2_den-bound | cub   | 74 | 0 |
| 2005 | non-outbreak | faeces    | 1_H | 1_roaming   | ad    | 79 | 1 |
| 2005 | non-outbreak | faeces    | 2_M | 1_roaming   | subad | 68 | 0 |
| 2005 | non-outbreak | faeces    | 2_M | 2_den-bound | cub   | 79 | 1 |
| 2005 | non-outbreak | faeces    | 2_M | 2_den-bound | cub   | 79 | 1 |

|      |              |        |     |             |       |    |   |
|------|--------------|--------|-----|-------------|-------|----|---|
| 2005 | non-outbreak | faeces | 2_M | 2_den-bound | cub   | 79 | 1 |
| 2005 | non-outbreak | faeces | 2_M | 2_den-bound | cub   | 79 | 0 |
| 2005 | non-outbreak | faeces | 3_L | 1_roaming   | ad    | 68 | 0 |
| 2005 | non-outbreak | faeces | 2_M | 2_den-bound | cub   | 67 | 1 |
| 2005 | non-outbreak | faeces | 1_H | 1_roaming   | ad    | 67 | 0 |
| 2005 | non-outbreak | faeces | 1_H | 1_roaming   | ad    | 72 | 0 |
| 2005 | non-outbreak | intest | 1_H | 2_den-bound | cub   | 67 | 0 |
| 2005 | non-outbreak | faeces | 1_H | 1_roaming   | ad    | 66 | 0 |
| 2005 | non-outbreak | faeces | 1_H | 1_roaming   | ad    | 71 | 1 |
| 2005 | non-outbreak | faeces | 1_H | 2_den-bound | cub   | 74 | 0 |
| 2005 | non-outbreak | lung   | 1_H | 2_den-bound | cub   | 74 | 0 |
| 2005 | non-outbreak | faeces | 1_H | 2_den-bound | cub   | 89 | 0 |
| 2005 | non-outbreak | faeces | 2_M | 2_den-bound | cub   | 74 | 0 |
| 2005 | non-outbreak | faeces | 1_H | 2_den-bound | cub   | 74 | 0 |
| 2005 | non-outbreak | faeces | 3_L | 1_roaming   | ad    | 69 | 1 |
| 2005 | non-outbreak | faeces | 2_M | 1_roaming   | ad    | 69 | 0 |
| 2005 | non-outbreak | faeces | 3_L | 1_roaming   | ad    | 69 | 1 |
| 2005 | non-outbreak | faeces | 2_M | 2_den-bound | cub   | 69 | 0 |
| 2005 | non-outbreak | faeces | 1_H | 1_roaming   | subad | 89 | 0 |
| 2005 | non-outbreak | faeces | 1_H | 2_den-bound | cub   | 89 | 0 |
| 2005 | non-outbreak | faeces | 1_H | 2_den-bound | cub   | 89 | 1 |
| 2005 | non-outbreak | faeces | 1_H | 1_roaming   | ad    | 67 | 1 |
| 2005 | non-outbreak | faeces | 2_M | 1_roaming   | subad | 67 | 0 |
| 2005 | non-outbreak | faeces | 2_M | 1_roaming   | ad    | 69 | 0 |
| 2005 | non-outbreak | faeces | 3_L | 1_roaming   | ad    | 69 | 1 |
| 2006 | outbreak     | faeces | 1_H | 2_den-bound | cub   | 74 | 0 |
| 2006 | outbreak     | faeces | 1_H | 2_den-bound | cub   | 74 | 1 |
| 2006 | outbreak     | faeces | 2_M | 2_den-bound | cub   | 89 | 1 |
| 2006 | outbreak     | faeces | 3_L | 1_roaming   | ad    | 72 | 1 |
| 2006 | outbreak     | faeces | 3_L | 1_roaming   | ad    | 72 | 1 |
| 2006 | outbreak     | faeces | 1_H | 2_den-bound | cub   | 74 | 0 |
| 2006 | outbreak     | faeces | 1_H | 2_den-bound | cub   | 74 | 1 |
| 2006 | outbreak     | faeces | 1_H | 2_den-bound | cub   | 72 | 1 |
| 2006 | outbreak     | faeces | 1_H | 1_roaming   | ad    | 74 | 1 |
| 2006 | outbreak     | faeces | 1_H | 2_den-bound | cub   | 88 | 1 |
| 2006 | outbreak     | faeces | 2_M | 2_den-bound | cub   | 74 | 0 |
| 2006 | outbreak     | faeces | 3_L | 1_roaming   | ad    | 88 | 0 |
| 2006 | outbreak     | faeces | 3_L | 1_roaming   | ad    | 88 | 0 |
| 2006 | outbreak     | faeces | 1_H | 1_roaming   | ad    | 72 | 1 |
| 2006 | outbreak     | faeces | 2_M | 1_roaming   | ad    | 74 | 0 |
| 2006 | outbreak     | faeces | 2_M | 1_roaming   | subad | 74 | 0 |
| 2006 | outbreak     | faeces | 2_M | 2_den-bound | cub   | 72 | 0 |
| 2006 | outbreak     | faeces | 1_H | 2_den-bound | cub   | 72 | 1 |
| 2006 | outbreak     | faeces | 2_M | 1_roaming   | ad    | 88 | 0 |
| 2006 | outbreak     | faeces | 2_M | 2_den-bound | cub   | 88 | 1 |
| 2006 | outbreak     | faeces | 2_M | 2_den-bound | cub   | 72 | 1 |
| 2006 | outbreak     | faeces | 2_M | 2_den-bound | cub   | 73 | 0 |
| 2006 | outbreak     | faeces | 2_M | 2_den-bound | cub   | 73 | 0 |
| 2006 | outbreak     | faeces | 2_M | 2_den-bound | cub   | 73 | 0 |

|      |          |        |     |             |       |     |   |
|------|----------|--------|-----|-------------|-------|-----|---|
| 2006 | outbreak | faeces | 1_H | 1_roaming   | subad | 88  | 0 |
| 2006 | outbreak | faeces | 1_H | 2_den-bound | cub   | 88  | 1 |
| 2006 | outbreak | faeces | 3_L | 1_roaming   | ad    | 75  | 1 |
| 2006 | outbreak | faeces | 1_H | 2_den-bound | cub   | 74  | 0 |
| 2006 | outbreak | faeces | 2_M | 2_den-bound | cub   | 74  | 0 |
| 2006 | outbreak | faeces | 1_H | 2_den-bound | cub   | 91  | 1 |
| 2006 | outbreak | faeces | 1_H | 2_den-bound | cub   | 91  | 1 |
| 2006 | outbreak | faeces | 1_H | 1_roaming   | ad    | 73  | 1 |
| 2006 | outbreak | faeces | 3_L | 1_roaming   | ad    | 81  | 1 |
| 2006 | outbreak | faeces | 2_M | 2_den-bound | cub   | 79  | 0 |
| 2006 | outbreak | faeces | 1_H | 1_roaming   | ad    | 94  | 0 |
| 2006 | outbreak | faeces | 2_M | 2_den-bound | cub   | 81  | 1 |
| 2006 | outbreak | faeces | 2_M | 2_den-bound | cub   | 81  | 0 |
| 2006 | outbreak | faeces | 2_M | 2_den-bound | cub   | 93  | 1 |
| 2006 | outbreak | faeces | 1_H | 2_den-bound | cub   | 76  | 1 |
| 2006 | outbreak | faeces | 1_H | 2_den-bound | cub   | 78  | 1 |
| 2006 | outbreak | faeces | 2_M | 2_den-bound | cub   | 78  | 1 |
| 2006 | outbreak | faeces | 1_H | 2_den-bound | cub   | 78  | 1 |
| 2006 | outbreak | faeces | 3_L | 1_roaming   | ad    | 78  | 0 |
| 2006 | outbreak | faeces | 1_H | 2_den-bound | cub   | 78  | 1 |
| 2006 | outbreak | faeces | 1_H | 2_den-bound | cub   | 78  | 0 |
| 2006 | outbreak | faeces | 1_H | 2_den-bound | cub   | 78  | 0 |
| 2006 | outbreak | faeces | 1_H | 1_roaming   | ad    | 79  | 1 |
| 2006 | outbreak | faeces | 1_H | 2_den-bound | cub   | 79  | 0 |
| 2006 | outbreak | faeces | 3_L | 1_roaming   | ad    | 97  | 0 |
| 2006 | outbreak | faeces | 1_H | 2_den-bound | cub   | 78  | 1 |
| 2007 | outbreak | faeces | 3_L | 1_roaming   | ad    | 70  | 1 |
| 2007 | outbreak | faeces | 2_M | 1_roaming   | ad    | 70  | 0 |
| 2007 | outbreak | faeces | 3_L | 1_roaming   | ad    | 70  | 1 |
| 2007 | outbreak | faeces | 1_H | 2_den-bound | cub   | 70  | 0 |
| 2007 | outbreak | faeces | 1_H | 2_den-bound | cub   | 69  | 0 |
| 2007 | outbreak | faeces | 1_H | 2_den-bound | cub   | 71  | 0 |
| 2007 | outbreak | faeces | 3_L | 1_roaming   | ad    | 70  | 0 |
| 2007 | outbreak | faeces | 3_L | 1_roaming   | ad    | 100 | 1 |
| 2007 | outbreak | faeces | 2_M | 2_den-bound | cub   | 100 | 0 |
| 2007 | outbreak | faeces | 3_L | 1_roaming   | ad    | 77  | 0 |
| 2007 | outbreak | faeces | 2_M | 2_den-bound | cub   | 100 | 0 |
| 2007 | outbreak | faeces | 2_M | 2_den-bound | cub   | 100 | 0 |
| 2007 | outbreak | faeces | 2_M | 1_roaming   | subad | 77  | 0 |
| 2007 | outbreak | faeces | 3_L | 1_roaming   | ad    | 77  | 0 |
| 2007 | outbreak | faeces | 3_L | 1_roaming   | ad    | 76  | 1 |
| 2007 | outbreak | faeces | 1_H | 1_roaming   | ad    | 97  | 1 |
| 2007 | outbreak | faeces | 1_H | 1_roaming   | ad    | 75  | 1 |
| 2007 | outbreak | faeces | 1_H | 2_den-bound | cub   | 75  | 1 |
| 2007 | outbreak | faeces | 1_H | 1_roaming   | ad    | 76  | 0 |
| 2007 | outbreak | faeces | 2_M | 2_den-bound | cub   | 78  | 1 |
| 2007 | outbreak | faeces | 1_H | 2_den-bound | cub   | 78  | 1 |
| 2007 | outbreak | faeces | 1_H | 2_den-bound | cub   | 97  | 0 |
| 2007 | outbreak | faeces | 1_H | 2_den-bound | cub   | 78  | 1 |

|      |              |        |     |             |       |     |   |
|------|--------------|--------|-----|-------------|-------|-----|---|
| 2007 | outbreak     | faeces | 2_M | 2_den-bound | cub   | 78  | 0 |
| 2007 | outbreak     | faeces | 1_H | 2_den-bound | cub   | 78  | 1 |
| 2007 | outbreak     | faeces | 3_L | 1_roaming   | ad    | 78  | 0 |
| 2007 | outbreak     | faeces | 2_M | 1_roaming   | ad    | 77  | 0 |
| 2007 | outbreak     | faeces | 1_H | 1_roaming   | ad    | 100 | 0 |
| 2007 | outbreak     | faeces | 1_H | 2_den-bound | cub   | 100 | 0 |
| 2007 | outbreak     | faeces | 1_H | 1_roaming   | ad    | 100 | 0 |
| 2007 | outbreak     | faeces | 2_M | 1_roaming   | subad | 100 | 0 |
| 2007 | outbreak     | faeces | 2_M | 1_roaming   | subad | 100 | 0 |
| 2007 | outbreak     | faeces | 2_M | 2_den-bound | cub   | 78  | 1 |
| 2007 | outbreak     | faeces | 1_H | 2_den-bound | cub   | 78  | 1 |
| 2007 | outbreak     | faeces | 2_M | 2_den-bound | cub   | 74  | 0 |
| 2007 | outbreak     | faeces | 1_H | 2_den-bound | cub   | 99  | 0 |
| 2007 | outbreak     | faeces | 2_M | 1_roaming   | ad    | 75  | 1 |
| 2007 | outbreak     | faeces | 1_H | 2_den-bound | cub   | 97  | 1 |
| 2007 | outbreak     | faeces | 1_H | 2_den-bound | cub   | 97  | 0 |
| 2007 | outbreak     | faeces | 1_H | 1_roaming   | ad    | 78  | 1 |
| 2007 | outbreak     | faeces | 1_H | 1_roaming   | ad    | 78  | 0 |
| 2007 | outbreak     | faeces | 1_H | 1_roaming   | ad    | 75  | 1 |
| 2007 | outbreak     | faeces | 1_H | 1_roaming   | subad | 75  | 0 |
| 2007 | outbreak     | faeces | 1_H | 1_roaming   | subad | 75  | 1 |
| 2007 | outbreak     | faeces | 2_M | 1_roaming   | ad    | 98  | 1 |
| 2007 | outbreak     | faeces | 1_H | 1_roaming   | ad    | 74  | 1 |
| 2007 | outbreak     | faeces | 2_M | 2_den-bound | cub   | 74  | 1 |
| 2007 | outbreak     | faeces | 2_M | 1_roaming   | ad    | 97  | 1 |
| 2007 | outbreak     | faeces | 1_H | 1_roaming   | ad    | 73  | 1 |
| 2007 | outbreak     | faeces | 2_M | 1_roaming   | ad    | 97  | 1 |
| 2007 | outbreak     | faeces | 1_H | 1_roaming   | ad    | 73  | 1 |
| 2007 | outbreak     | faeces | 1_H | 1_roaming   | ad    | 73  | 1 |
| 2007 | outbreak     | faeces | 2_M | 1_roaming   | subad | 75  | 0 |
| 2007 | outbreak     | faeces | 1_H | 2_den-bound | cub   | 97  | 0 |
| 2007 | outbreak     | faeces | 1_H | 2_den-bound | cub   | 97  | 1 |
| 2007 | outbreak     | faeces | 1_H | 2_den-bound | cub   | 97  | 1 |
| 2007 | outbreak     | faeces | 3_L | 1_roaming   | ad    | 75  | 1 |
| 2007 | outbreak     | faeces | 1_H | 1_roaming   | subad | 71  | 0 |
| 2007 | outbreak     | faeces | 2_M | 2_den-bound | cub   | 71  | 1 |
| 2007 | outbreak     | faeces | 2_M | 2_den-bound | cub   | 82  | 0 |
| 2007 | outbreak     | faeces | 1_H | 2_den-bound | cub   | 82  | 1 |
| 2007 | outbreak     | faeces | 1_H | 2_den-bound | cub   | 68  | 1 |
| 2007 | outbreak     | faeces | 1_H | 2_den-bound | cub   | 68  | 0 |
| 2007 | outbreak     | faeces | 1_H | 2_den-bound | cub   | 91  | 0 |
| 2007 | outbreak     | faeces | 1_H | 2_den-bound | cub   | 81  | 0 |
| 2007 | outbreak     | faeces | 2_M | 2_den-bound | cub   | 88  | 0 |
| 2007 | outbreak     | faeces | 2_M | 1_roaming   | ad    | 68  | 1 |
| 2007 | outbreak     | faeces | 1_H | 1_roaming   | subad | 68  | 0 |
| 2007 | outbreak     | faeces | 1_H | 2_den-bound | cub   | 80  | 0 |
| 2007 | outbreak     | faeces | 2_M | 2_den-bound | cub   | 79  | 1 |
| 2008 | non-outbreak | faeces | 2_M | 2_den-bound | cub   | 78  | 1 |
| 2008 | non-outbreak | faeces | 1_H | 2_den-bound | cub   | 81  | 0 |

|      |              |        |     |             |       |    |   |
|------|--------------|--------|-----|-------------|-------|----|---|
| 2008 | non-outbreak | faeces | 1_H | 2_den-bound | cub   | 81 | 0 |
| 2008 | non-outbreak | faeces | 1_H | 2_den-bound | cub   | 79 | 0 |
| 2008 | non-outbreak | faeces | 1_H | 2_den-bound | cub   | 79 | 0 |
| 2008 | non-outbreak | faeces | 1_H | 2_den-bound | cub   | 77 | 0 |
| 2008 | non-outbreak | faeces | 2_M | 2_den-bound | cub   | 78 | 0 |
| 2008 | non-outbreak | faeces | 1_H | 2_den-bound | cub   | 77 | 0 |
| 2008 | non-outbreak | faeces | 1_H | 2_den-bound | cub   | 79 | 0 |
| 2008 | non-outbreak | faeces | 1_H | 2_den-bound | cub   | 77 | 0 |
| 2008 | non-outbreak | faeces | 2_M | 2_den-bound | cub   | 80 | 0 |
| 2008 | non-outbreak | faeces | 1_H | 2_den-bound | cub   | 77 | 0 |
| 2008 | non-outbreak | faeces | 2_M | 2_den-bound | cub   | 77 | 0 |
| 2008 | non-outbreak | faeces | 1_H | 2_den-bound | cub   | 79 | 1 |
| 2008 | non-outbreak | faeces | 1_H | 2_den-bound | cub   | 76 | 1 |
| 2008 | non-outbreak | faeces | 2_M | 2_den-bound | cub   | 76 | 0 |
| 2008 | non-outbreak | faeces | 2_M | 2_den-bound | cub   | 80 | 0 |
| 2008 | non-outbreak | faeces | 1_H | 2_den-bound | cub   | 71 | 1 |
| 2008 | non-outbreak | faeces | 1_H | 2_den-bound | cub   | 84 | 1 |
| 2008 | non-outbreak | faeces | 1_H | 1_roaming   | subad | 82 | 1 |
| 2008 | non-outbreak | faeces | 3_L | 1_roaming   | ad    | 80 | 0 |
| 2008 | non-outbreak | faeces | 2_M | 1_roaming   | ad    | 81 | 1 |
| 2008 | non-outbreak | faeces | 2_M | 1_roaming   | subad | 81 | 1 |
| 2008 | non-outbreak | faeces | 1_H | 2_den-bound | cub   | 79 | 0 |
| 2008 | non-outbreak | faeces | 2_M | 1_roaming   | subad | 83 | 0 |
| 2008 | non-outbreak | faeces | 1_H | 1_roaming   | subad | 79 | 0 |
| 2008 | non-outbreak | faeces | 2_M | 2_den-bound | cub   | 79 | 0 |
| 2008 | non-outbreak | faeces | 1_H | 2_den-bound | cub   | 79 | 0 |
| 2008 | non-outbreak | faeces | 1_H | 2_den-bound | cub   | 79 | 0 |
| 2008 | non-outbreak | faeces | 2_M | 2_den-bound | cub   | 79 | 0 |
| 2008 | non-outbreak | faeces | 2_M | 2_den-bound | cub   | 80 | 0 |
| 2008 | non-outbreak | faeces | 2_M | 2_den-bound | cub   | 86 | 0 |
| 2008 | non-outbreak | faeces | 3_L | 1_roaming   | ad    | 86 | 0 |
| 2008 | non-outbreak | faeces | 1_H | 2_den-bound | cub   | 83 | 0 |
| 2008 | non-outbreak | faeces | 1_H | 2_den-bound | cub   | 77 | 0 |
| 2008 | non-outbreak | faeces | 2_M | 2_den-bound | cub   | 79 | 0 |
| 2008 | non-outbreak | faeces | 2_M | 1_roaming   | ad    | 84 | 0 |
| 2008 | non-outbreak | faeces | 2_M | 1_roaming   | ad    | 83 | 0 |
| 2008 | non-outbreak | faeces | 2_M | 2_den-bound | cub   | 83 | 0 |
| 2008 | non-outbreak | faeces | 1_H | 2_den-bound | cub   | 77 | 0 |
| 2008 | non-outbreak | faeces | 3_L | 1_roaming   | ad    | 86 | 0 |
| 2008 | non-outbreak | faeces | 2_M | 2_den-bound | cub   | 86 | 0 |
| 2008 | non-outbreak | faeces | 2_M | 2_den-bound | cub   | 84 | 0 |
| 2008 | non-outbreak | faeces | 2_M | 2_den-bound | cub   | 84 | 0 |
| 2008 | non-outbreak | faeces | 2_M | 2_den-bound | cub   | 84 | 0 |
| 2008 | non-outbreak | faeces | 1_H | 2_den-bound | cub   | 84 | 0 |
| 2008 | non-outbreak | faeces | 2_M | 2_den-bound | cub   | 83 | 1 |
| 2008 | non-outbreak | faeces | 2_M | 2_den-bound | cub   | 85 | 0 |
| 2008 | non-outbreak | faeces | 2_M | 1_roaming   | ad    | 85 | 0 |
| 2008 | non-outbreak | faeces | 1_H | 2_den-bound | cub   | 79 | 0 |
| 2008 | non-outbreak | faeces | 1_H | 2_den-bound | cub   | 79 | 0 |

|      |              |        |     |             |       |    |   |
|------|--------------|--------|-----|-------------|-------|----|---|
| 2008 | non-outbreak | faeces | 1_H | 2_den-bound | cub   | 85 | 1 |
| 2008 | non-outbreak | faeces | 3_L | 1_roaming   | ad    | 87 | 0 |
| 2008 | non-outbreak | faeces | 2_M | 2_den-bound | cub   | 79 | 0 |
| 2008 | non-outbreak | faeces | 3_L | 1_roaming   | ad    | 75 | 1 |
| 2008 | non-outbreak | faeces | 2_M | 2_den-bound | cub   | 79 | 0 |
| 2008 | non-outbreak | faeces | 2_M | 1_roaming   | ad    | 87 | 1 |
| 2008 | non-outbreak | faeces | 1_H | 1_roaming   | subad | 87 | 0 |
| 2008 | non-outbreak | faeces | 2_M | 2_den-bound | cub   | 87 | 0 |
| 2008 | non-outbreak | faeces | 3_L | 1_roaming   | ad    | 75 | 0 |
| 2008 | non-outbreak | faeces | 2_M | 2_den-bound | cub   | 79 | 0 |
| 2009 | non-outbreak | faeces | 2_M | 2_den-bound | cub   | 81 | 0 |
| 2009 | non-outbreak | faeces | 1_H | 2_den-bound | cub   | 83 | 0 |
| 2009 | non-outbreak | faeces | 1_H | 2_den-bound | cub   | 81 | 0 |
| 2009 | non-outbreak | faeces | 2_M | 2_den-bound | cub   | 76 | 1 |
| 2009 | non-outbreak | faeces | 1_H | 2_den-bound | cub   | 76 | 0 |
| 2009 | non-outbreak | faeces | 2_M | 1_roaming   | ad    | 82 | 0 |
| 2009 | non-outbreak | faeces | 2_M | 2_den-bound | cub   | 82 | 0 |
| 2009 | non-outbreak | faeces | 2_M | 1_roaming   | ad    | 79 | 0 |
| 2009 | non-outbreak | faeces | 1_H | 2_den-bound | cub   | 74 | 0 |
| 2009 | non-outbreak | faeces | 2_M | 2_den-bound | cub   | 74 | 0 |
| 2009 | non-outbreak | faeces | 1_H | 2_den-bound | cub   | 74 | 0 |
| 2009 | non-outbreak | faeces | 1_H | 2_den-bound | cub   | 79 | 0 |
| 2009 | non-outbreak | faeces | 1_H | 2_den-bound | cub   | 77 | 0 |
| 2009 | non-outbreak | faeces | 3_L | 1_roaming   | ad    | 79 | 1 |
| 2009 | non-outbreak | faeces | 2_M | 2_den-bound | cub   | 79 | 0 |
| 2009 | non-outbreak | faeces | 3_L | 1_roaming   | ad    | 76 | 1 |
| 2009 | non-outbreak | faeces | 3_L | 1_roaming   | ad    | 83 | 0 |
| 2009 | non-outbreak | faeces | 2_M | 1_roaming   | ad    | 83 | 1 |
| 2009 | non-outbreak | faeces | 1_H | 2_den-bound | cub   | 82 | 0 |
| 2009 | non-outbreak | faeces | 1_H | 2_den-bound | cub   | 92 | 0 |
| 2009 | non-outbreak | faeces | 1_H | 2_den-bound | cub   | 92 | 1 |
| 2009 | non-outbreak | faeces | 2_M | 2_den-bound | cub   | 92 | 0 |
| 2009 | non-outbreak | faeces | 2_M | 1_roaming   | ad    | 96 | 0 |
| 2009 | non-outbreak | faeces | 1_H | 2_den-bound | cub   | 96 | 0 |
| 2009 | non-outbreak | faeces | 1_H | 2_den-bound | cub   | 77 | 0 |
| 2009 | non-outbreak | faeces | 1_H | 1_roaming   | subad | 87 | 1 |
| 2009 | non-outbreak | faeces | 2_M | 2_den-bound | cub   | 78 | 0 |
| 2009 | non-outbreak | faeces | 2_M | 2_den-bound | cub   | 98 | 0 |
| 2009 | non-outbreak | faeces | 2_M | 2_den-bound | cub   | 99 | 0 |
| 2009 | non-outbreak | faeces | 1_H | 2_den-bound | cub   | 81 | 0 |
| 2009 | non-outbreak | faeces | 1_H | 2_den-bound | cub   | 97 | 0 |
| 2009 | non-outbreak | faeces | 2_M | 2_den-bound | cub   | 97 | 0 |
| 2009 | non-outbreak | faeces | 1_H | 1_roaming   | ad    | 99 | 0 |
| 2009 | non-outbreak | faeces | 1_H | 2_den-bound | cub   | 99 | 0 |
| 2009 | non-outbreak | faeces | 2_M | 2_den-bound | cub   | 98 | 0 |
| 2009 | non-outbreak | faeces | 1_H | 1_roaming   | ad    | 80 | 0 |
| 2009 | non-outbreak | faeces | 1_H | 2_den-bound | cub   | 80 | 0 |
| 2009 | non-outbreak | faeces | 2_M | 2_den-bound | cub   | 80 | 0 |
| 2009 | non-outbreak | faeces | 2_M | 1_roaming   | ad    | 99 | 0 |

|      |              |        |     |             |       |     |   |
|------|--------------|--------|-----|-------------|-------|-----|---|
| 2009 | non-outbreak | faeces | 1_H | 2_den-bound | cub   | 98  | 0 |
| 2009 | non-outbreak | faeces | 1_H | 2_den-bound | cub   | 98  | 0 |
| 2009 | non-outbreak | faeces | 2_M | 1_roaming   | ad    | 98  | 1 |
| 2009 | non-outbreak | faeces | 2_M | 2_den-bound | cub   | 78  | 0 |
| 2009 | non-outbreak | faeces | 2_M | 1_roaming   | ad    | 98  | 0 |
| 2009 | non-outbreak | faeces | 1_H | 2_den-bound | cub   | 102 | 0 |
| 2009 | non-outbreak | faeces | 1_H | 2_den-bound | cub   | 102 | 1 |
| 2009 | non-outbreak | faeces | 2_M | 1_roaming   | ad    | 102 | 1 |
| 2009 | non-outbreak | faeces | 2_M | 2_den-bound | cub   | 102 | 0 |
| 2009 | non-outbreak | faeces | 2_M | 1_roaming   | ad    | 102 | 1 |
| 2009 | non-outbreak | faeces | 1_H | 2_den-bound | cub   | 78  | 0 |
| 2009 | non-outbreak | faeces | 2_M | 2_den-bound | cub   | 78  | 0 |
| 2010 | outbreak     | faeces | 1_H | 2_den-bound | cub   | 81  | 1 |
| 2010 | outbreak     | faeces | 1_H | 1_roaming   | ad    | 110 | 1 |
| 2010 | outbreak     | faeces | 3_L | 1_roaming   | ad    | 113 | 1 |
| 2010 | outbreak     | faeces | 3_L | 1_roaming   | ad    | 91  | 0 |
| 2010 | outbreak     | faeces | 3_L | 1_roaming   | ad    | 116 | 0 |
| 2010 | outbreak     | faeces | 2_M | 1_roaming   | ad    | 93  | 0 |
| 2010 | outbreak     | faeces | 2_M | 1_roaming   | ad    | 93  | 0 |
| 2010 | outbreak     | faeces | 2_M | 1_roaming   | ad    | 96  | 1 |
| 2010 | outbreak     | faeces | 1_H | 1_roaming   | ad    | 120 | 0 |
| 2010 | outbreak     | faeces | 3_L | 1_roaming   | ad    | 100 | 1 |
| 2010 | outbreak     | faeces | 2_M | 1_roaming   | ad    | 118 | 0 |
| 2010 | outbreak     | faeces | 2_M | 1_roaming   | ad    | 107 | 0 |
| 2010 | outbreak     | faeces | 1_H | 1_roaming   | ad    | 119 | 0 |
| 2010 | outbreak     | faeces | 2_M | 2_den-bound | cub   | 119 | 0 |
| 2010 | outbreak     | faeces | 2_M | 1_roaming   | ad    | 120 | 1 |
| 2010 | outbreak     | faeces | 2_M | 2_den-bound | cub   | 115 | 1 |
| 2010 | outbreak     | faeces | 1_H | 2_den-bound | cub   | 115 | 1 |
| 2010 | outbreak     | faeces | 1_H | 2_den-bound | cub   | 121 | 1 |
| 2010 | outbreak     | faeces | 2_M | 2_den-bound | cub   | 115 | 0 |
| 2010 | outbreak     | faeces | 2_M | 2_den-bound | cub   | 115 | 1 |
| 2010 | outbreak     | faeces | 1_H | 1_roaming   | ad    | 116 | 0 |
| 2010 | outbreak     | faeces | 1_H | 2_den-bound | cub   | 116 | 0 |
| 2010 | outbreak     | faeces | 1_H | 2_den-bound | cub   | 118 | 1 |
| 2010 | outbreak     | faeces | 1_H | 2_den-bound | cub   | 118 | 0 |
| 2010 | outbreak     | faeces | 2_M | 1_roaming   | subad | 120 | 1 |
| 2010 | outbreak     | faeces | 2_M | 2_den-bound | cub   | 119 | 1 |
| 2010 | outbreak     | faeces | 1_H | 2_den-bound | cub   | 117 | 0 |
| 2010 | outbreak     | faeces | 2_M | 1_roaming   | ad    | 116 | 1 |
| 2010 | outbreak     | faeces | 1_H | 2_den-bound | cub   | 116 | 1 |
| 2010 | outbreak     | faeces | 2_M | 2_den-bound | cub   | 117 | 0 |
| 2010 | outbreak     | faeces | 2_M | 2_den-bound | cub   | 117 | 0 |
| 2010 | outbreak     | faeces | 2_M | 2_den-bound | cub   | 117 | 1 |
| 2010 | outbreak     | faeces | 2_M | 2_den-bound | cub   | 117 | 0 |
| 2010 | outbreak     | faeces | 1_H | 2_den-bound | cub   | 116 | 0 |
| 2010 | outbreak     | faeces | 1_H | 2_den-bound | cub   | 116 | 0 |
| 2010 | outbreak     | faeces | 2_M | 2_den-bound | cub   | 117 | 0 |
| 2010 | outbreak     | faeces | 2_M | 2_den-bound | cub   | 117 | 0 |



|      |              |        |     |             |       |     |   |
|------|--------------|--------|-----|-------------|-------|-----|---|
| 2010 | outbreak     | faeces | 1_H | 2_den-bound | cub   | 116 | 0 |
| 2011 | non-outbreak | faeces | 2_M | 2_den-bound | cub   | 118 | 1 |
| 2011 | non-outbreak | faeces | 2_M | 2_den-bound | cub   | 118 | 0 |
| 2011 | non-outbreak | faeces | 1_H | 2_den-bound | cub   | 118 | 0 |
| 2011 | non-outbreak | faeces | 1_H | 2_den-bound | cub   | 121 | 0 |
| 2011 | non-outbreak | faeces | 2_M | 2_den-bound | cub   | 118 | 0 |
| 2011 | non-outbreak | faeces | 1_H | 2_den-bound | cub   | 121 | 1 |
| 2011 | non-outbreak | faeces | 2_M | 2_den-bound | cub   | 121 | 0 |
| 2011 | non-outbreak | faeces | 3_L | 1_roaming   | ad    | 121 | 0 |
| 2011 | non-outbreak | faeces | 1_H | 2_den-bound | cub   | 116 | 0 |
| 2011 | non-outbreak | faeces | 1_H | 2_den-bound | cub   | 121 | 0 |
| 2011 | non-outbreak | faeces | 1_H | 2_den-bound | cub   | 121 | 0 |
| 2011 | non-outbreak | faeces | 1_H | 1_roaming   | ad    | 121 | 0 |
| 2011 | non-outbreak | faeces | 1_H | 2_den-bound | cub   | 121 | 1 |
| 2011 | non-outbreak | faeces | 1_H | 2_den-bound | cub   | 121 | 0 |
| 2011 | non-outbreak | faeces | 1_H | 2_den-bound | cub   | 118 | 0 |
| 2011 | non-outbreak | faeces | 2_M | 2_den-bound | cub   | 121 | 0 |
| 2011 | non-outbreak | faeces | 2_M | 2_den-bound | cub   | 121 | 0 |
| 2011 | non-outbreak | faeces | 1_H | 1_roaming   | subad | 124 | 1 |
| 2011 | non-outbreak | faeces | 2_M | 2_den-bound | cub   | 121 | 0 |
| 2011 | non-outbreak | faeces | 2_M | 2_den-bound | cub   | 119 | 0 |
| 2011 | non-outbreak | faeces | 1_H | 2_den-bound | cub   | 119 | 1 |
| 2011 | non-outbreak | faeces | 2_M | 2_den-bound | cub   | 119 | 1 |
| 2011 | non-outbreak | faeces | 1_H | 2_den-bound | cub   | 122 | 0 |
| 2011 | non-outbreak | faeces | 1_H | 2_den-bound | cub   | 119 | 0 |
| 2011 | non-outbreak | faeces | 1_H | 2_den-bound | cub   | 119 | 0 |
| 2011 | non-outbreak | faeces | 2_M | 2_den-bound | cub   | 124 | 0 |
| 2011 | non-outbreak | faeces | 3_L | 1_roaming   | ad    | 122 | 1 |
| 2011 | non-outbreak | spleen | 2_M | 2_den-bound | cub   | 122 | 0 |
| 2011 | non-outbreak | faeces | 2_M | 2_den-bound | cub   | 121 | 1 |
| 2011 | non-outbreak | faeces | 2_M | 2_den-bound | cub   | 119 | 1 |
| 2011 | non-outbreak | faeces | 1_H | 2_den-bound | cub   | 121 | 0 |
| 2011 | non-outbreak | faeces | 1_H | 2_den-bound | cub   | 121 | 0 |
| 2011 | non-outbreak | faeces | 2_M | 1_roaming   | subad | 124 | 0 |
| 2011 | non-outbreak | faeces | 1_H | 2_den-bound | cub   | 121 | 1 |
| 2011 | non-outbreak | faeces | 3_L | 1_roaming   | ad    | 121 | 0 |
| 2011 | non-outbreak | faeces | 2_M | 1_roaming   | ad    | 122 | 1 |
| 2011 | non-outbreak | faeces | 1_H | 1_roaming   | ad    | 123 | 0 |
| 2011 | non-outbreak | faeces | 1_H | 1_roaming   | subad | 123 | 0 |
| 2011 | non-outbreak | faeces | 1_H | 1_roaming   | subad | 123 | 0 |
| 2011 | non-outbreak | faeces | 2_M | 2_den-bound | cub   | 124 | 0 |
| 2011 | non-outbreak | faeces | 1_H | 2_den-bound | cub   | 123 | 0 |
| 2011 | non-outbreak | faeces | 1_H | 1_roaming   | subad | 123 | 0 |
| 2011 | non-outbreak | faeces | 2_M | 2_den-bound | cub   | 123 | 0 |
| 2011 | non-outbreak | faeces | 1_H | 2_den-bound | cub   | 123 | 0 |
| 2011 | non-outbreak | faeces | 1_H | 2_den-bound | cub   | 123 | 0 |
| 2011 | non-outbreak | faeces | 2_M | 2_den-bound | cub   | 124 | 0 |
| 2011 | non-outbreak | faeces | 1_H | 2_den-bound | cub   | 124 | 0 |
| 2011 | non-outbreak | faeces | 2_M | 2_den-bound | cub   | 124 | 0 |

|      |              |        |     |             |       |     |   |
|------|--------------|--------|-----|-------------|-------|-----|---|
| 2011 | non-outbreak | faeces | 2_M | 2_den-bound | cub   | 124 | 1 |
| 2011 | non-outbreak | faeces | 1_H | 2_den-bound | cub   | 124 | 1 |
| 2011 | non-outbreak | faeces | 2_M | 2_den-bound | cub   | 124 | 1 |
| 2011 | non-outbreak | faeces | 3_L | 1_roaming   | ad    | 122 | 0 |
| 2011 | non-outbreak | faeces | 2_M | 1_roaming   | ad    | 124 | 0 |
| 2011 | non-outbreak | faeces | 1_H | 2_den-bound | cub   | 120 | 0 |
| 2011 | non-outbreak | faeces | 2_M | 2_den-bound | cub   | 120 | 0 |
| 2011 | non-outbreak | lung   | 1_H | 1_roaming   | ad    | 134 | 0 |
| 2011 | non-outbreak | faeces | 2_M | 2_den-bound | cub   | 123 | 0 |
| 2011 | non-outbreak | faeces | 2_M | 2_den-bound | cub   | 120 | 0 |
| 2011 | non-outbreak | faeces | 2_M | 2_den-bound | cub   | 123 | 0 |
| 2011 | non-outbreak | faeces | 1_H | 1_roaming   | ad    | 123 | 1 |
| 2011 | non-outbreak | faeces | 1_H | 1_roaming   | ad    | 120 | 0 |
| 2011 | non-outbreak | faeces | 1_H | 1_roaming   | ad    | 127 | 0 |
| 2011 | non-outbreak | faeces | 2_M | 2_den-bound | cub   | 123 | 1 |
| 2011 | non-outbreak | faeces | 2_M | 2_den-bound | cub   | 129 | 0 |
| 2011 | non-outbreak | faeces | 3_L | 1_roaming   | ad    | 120 | 0 |
| 2011 | non-outbreak | faeces | 2_M | 2_den-bound | cub   | 128 | 0 |
| 2011 | non-outbreak | faeces | 2_M | 2_den-bound | cub   | 128 | 0 |
| 2011 | non-outbreak | faeces | 2_M | 2_den-bound | cub   | 129 | 0 |
| 2011 | non-outbreak | faeces | 1_H | 2_den-bound | cub   | 129 | 0 |
| 2011 | non-outbreak | faeces | 2_M | 2_den-bound | cub   | 118 | 0 |
| 2011 | non-outbreak | faeces | 1_H | 1_roaming   | subad | 132 | 1 |
| 2011 | non-outbreak | faeces | 1_H | 2_den-bound | cub   | 132 | 1 |
| 2011 | non-outbreak | faeces | 2_M | 2_den-bound | cub   | 118 | 1 |
| 2011 | non-outbreak | faeces | 3_L | 1_roaming   | ad    | 117 | 0 |
| 2011 | non-outbreak | faeces | 2_M | 2_den-bound | cub   | 126 | 0 |
| 2011 | non-outbreak | faeces | 2_M | 2_den-bound | cub   | 117 | 0 |
| 2011 | non-outbreak | faeces | 1_H | 2_den-bound | cub   | 118 | 0 |
| 2011 | non-outbreak | faeces | 1_H | 2_den-bound | cub   | 125 | 0 |
| 2011 | non-outbreak | faeces | 2_M | 2_den-bound | cub   | 116 | 1 |
| 2011 | non-outbreak | faeces | 2_M | 2_den-bound | cub   | 116 | 1 |
| 2011 | non-outbreak | faeces | 2_M | 2_den-bound | cub   | 134 | 1 |
| 2011 | non-outbreak | faeces | 2_M | 2_den-bound | cub   | 127 | 0 |
| 2011 | non-outbreak | faeces | 2_M | 2_den-bound | cub   | 127 | 0 |
| 2011 | non-outbreak | faeces | 1_H | 2_den-bound | cub   | 134 | 0 |
| 2011 | non-outbreak | faeces | 2_M | 2_den-bound | cub   | 138 | 0 |
| 2011 | non-outbreak | faeces | 3_L | 1_roaming   | ad    | 123 | 0 |
| 2011 | non-outbreak | faeces | 3_L | 1_roaming   | ad    | 140 | 0 |
| 2011 | non-outbreak | faeces | 1_H | 1_roaming   | subad | 119 | 0 |
| 2011 | non-outbreak | faeces | 2_M | 1_roaming   | ad    | 119 | 0 |
| 2011 | non-outbreak | faeces | 2_M | 2_den-bound | cub   | 119 | 0 |
| 2011 | non-outbreak | faeces | 2_M | 2_den-bound | cub   | 119 | 0 |
| 2011 | non-outbreak | faeces | 2_M | 2_den-bound | cub   | 126 | 0 |
| 2011 | non-outbreak | faeces | 2_M | 2_den-bound | cub   | 119 | 0 |
| 2011 | non-outbreak | lung   | 2_M | 1_roaming   | subad | 141 | 0 |
| 2011 | non-outbreak | faeces | 2_M | 2_den-bound | cub   | 141 | 0 |
| 2011 | non-outbreak | faeces | 1_H | 2_den-bound | cub   | 119 | 0 |
| 2011 | non-outbreak | faeces | 1_H | 1_roaming   | subad | 126 | 0 |

|      |              |        |     |             |       |     |   |
|------|--------------|--------|-----|-------------|-------|-----|---|
| 2011 | non-outbreak | faeces | 1_H | 2_den-bound | cub   | 142 | 0 |
| 2011 | non-outbreak | faeces | 2_M | 1_roaming   | subad | 130 | 0 |
| 2011 | non-outbreak | faeces | 1_H | 2_den-bound | cub   | 140 | 1 |
| 2011 | non-outbreak | faeces | 1_H | 2_den-bound | cub   | 140 | 0 |
| 2011 | non-outbreak | faeces | 2_M | 2_den-bound | cub   | 142 | 0 |
| 2011 | non-outbreak | faeces | 1_H | 2_den-bound | cub   | 142 | 0 |
| 2011 | non-outbreak | faeces | 2_M | 2_den-bound | cub   | 142 | 0 |
| 2011 | non-outbreak | faeces | 2_M | 2_den-bound | cub   | 142 | 0 |
| 2011 | non-outbreak | faeces | 2_M | 2_den-bound | cub   | 142 | 1 |
| 2011 | non-outbreak | faeces | 2_M | 2_den-bound | cub   | 142 | 0 |
| 2011 | non-outbreak | faeces | 2_M | 2_den-bound | cub   | 142 | 0 |
| 2011 | non-outbreak | faeces | 2_M | 2_den-bound | cub   | 142 | 0 |
| 2011 | non-outbreak | faeces | 1_H | 2_den-bound | cub   | 142 | 0 |
| 2011 | non-outbreak | faeces | 1_H | 2_den-bound | cub   | 134 | 0 |

Year: year in which sample was collected. Outbreak: year categorized as being an outbreak year (“outbreak”) or as a non-outbreak year (“non- outbreak”). Samp\_Type: type of tissue sample. Contact: social contact rate as defined in the Methods (“1-H” is high social contact rate, “2\_M” is medium social contact rate, “3\_L” is low social contact rate). Roamer: animal range as defined in the Methods (“1\_roaming” for adults and subadults, “2\_den-bound” for cubs). Ad\_Juv: age categories as defined in the Methods (“cub” 0-12 months old, “subad” 12-24 months old, “ad” older than 24 months). Clan\_Size: total number of clan members on the day of sampling. Sapovirus\_Pcr: Dependent variable reporting the outcome of genetic diagnostic (1 is presence of Sapovirus, 0 is absence).
