# Supplementary material for: Divergent Sapovirus Strains and Infection Prevalence in Wild Carnivores in the Serengeti Ecosystem: A Long-Term Study
Source: PubMed Central journal article supplement (PMC5035092; doi:10.1371/journal.pone.0163548), 2016-09-23
Supplement: pone.0163548.s002.pdf [file pone.0163548.s002.pdf]

## Supporting Information

### Divergent sapovirus strains and infection prevalence in wild carnivores in the Serengeti ecosystem: a long-term study

Ximena A Olarte-Castillo, Heribert Hofer, Katja V Goller, Vito Martella, Patricia D Moehlman, Marion L East

**S2 Table: Data set for the analysis of repeatedly sampled spotted hyenas**

| Individual | Sample Sequence | Interval Days | RT-PCR  |
|------------|-----------------|---------------|---------|
| 1          | first           | 826           | neg-pos |
| 1          | second          |               |         |
| 2          | first           | 814           | neg-pos |
| 2          | second          |               |         |
| 3          | first           | 932           | neg-neg |
| 3          | second          |               |         |
| 4          | first           | 848           | neg-pos |
| 4          | second          |               |         |
| 5          | first           | 1156          | pos-pos |
| 5          | second          |               |         |
| 6          | first           | 775           | pos-neg |
| 6          | second          |               |         |
| 7          | first           | 1768          | neg-pos |
| 7          | second          |               |         |
| D          | first           | 26            | neg-neg |
| D          | second          | 1698          | neg-pos |
| D          | third           |               |         |
| 8          | first           | 1370          | pos-pos |
| 8          | second          |               |         |
| 9          | first           | 76            | pos-pos |
| 9          | second          |               |         |
| 10         | first           | 385           | neg-neg |
| 10         | second          |               |         |
| 11         | first           | 893           | neg-neg |
| 11         | second          |               |         |
| 12         | first           | 993           | neg-pos |
| 12         | second          |               |         |
| 13         | first           | 683           | pos-pos |
| 13         | second          |               |         |
| A          | first           | 124           | neg-neg |
| A          | second          | 10            | neg-neg |
| A          | third           |               |         |
| 14         | first           | 848           | pos-neg |
| 14         | second          |               |         |
| 15         | first           | 551           | neg-pos |
| 15         | second          |               |         |

|    |        |     |         |
|----|--------|-----|---------|
| 16 | first  | 432 | pos-neg |
| 16 | second |     |         |
| K  | first  | 755 | pos-pos |
| K  | second | 5   | pos-neg |
| K  | third  |     |         |
| J  | first  | 118 | neg-pos |
| J  | second | 715 | pos-pos |
| J  | third  |     |         |
| 17 | first  | 626 | pos-neg |
| 17 | second |     |         |
| 18 | first  | 158 | neg-pos |
| 18 | second |     |         |
| E  | first  | 9   | neg-neg |
| E  | second | 969 | neg-pos |
| E  | third  |     |         |
| 19 | first  | 149 | neg-pos |
| 19 | second |     |         |
| C  | first  | 23  | neg-neg |
| C  | second | 131 | neg-neg |
| C  | third  | 563 | neg-neg |
| C  | fourth |     |         |
| 20 | first  | 3   | neg-neg |
| 20 | second |     |         |
| 21 | first  | 86  | neg-neg |
| 21 | second |     |         |
| 22 | first  | 19  | neg-pos |
| 22 | second |     |         |
| H  | first  | 16  | neg-neg |
| H  | second | 20  | neg-neg |
| H  | third  | 352 | neg-pos |
| H  | fourth |     |         |
| 23 | first  | 108 | pos-neg |
| 23 | second |     |         |
| 24 | first  | 101 | neg-neg |
| 24 | second |     |         |
| 25 | first  | 64  | neg-neg |
| 25 | second |     |         |
| 26 | first  | 29  | neg-pos |
| 26 | second |     |         |
| 27 | first  | 8   | pos-neg |
| 27 | second |     |         |
| B  | first  | 19  | neg-neg |
| B  | second | 82  | neg-neg |
| B  | third  | 188 | neg-neg |
| B  | fourth |     |         |
| I  | first  | 6   | neg-neg |
| I  | second | 11  | neg-neg |

|    |        |      |         |
|----|--------|------|---------|
| I  | third  | 22   | neg-pos |
| I  | fourth |      |         |
| 28 | first  | 166  | neg-neg |
| 28 | second |      |         |
| 29 | first  | 57   | neg-neg |
| 29 | second |      |         |
| 30 | first  | 39   | neg-neg |
| 30 | second |      |         |
| L  | first  | 3    | pos-neg |
| L  | second | 99   | neg-neg |
| L  | third  |      |         |
| 31 | first  | 90   | neg-neg |
| 31 | second |      |         |
| 32 | first  | 2740 | pos-neg |
| 32 | second |      |         |
| 33 | first  | 911  | neg-pos |
| 33 | second |      |         |
| 34 | first  | 300  | neg-pos |
| 34 | second |      |         |
| 35 | first  | 1705 | neg-neg |
| 35 | second |      |         |
| 36 | first  | 54   | neg-neg |
| 36 | second |      |         |
| 37 | first  | 25   | neg-pos |
| 37 | second |      |         |
| 38 | first  | 1214 | neg-pos |
| 38 | second |      |         |
| 39 | first  | 89   | neg-pos |
| 39 | second |      |         |
| 40 | first  | 22   | neg-pos |
| 40 | second |      |         |
| 41 | first  | 1173 | neg-pos |
| 41 | second |      |         |
| 42 | first  | 596  | neg-neg |
| 42 | second |      |         |
| 43 | first  | 183  | neg-pos |
| 43 | second |      |         |
| 44 | first  | 275  | neg-neg |
| 44 | second |      |         |
| 45 | first  | 371  | pos-pos |
| 45 | second |      |         |
| 46 | first  | 45   | neg-neg |
| 46 | second |      |         |
| 47 | first  | 180  | pos-neg |
| 47 | second |      |         |
| 48 | first  | 9    | neg-pos |
| 48 | second |      |         |

|    |        |      |         |
|----|--------|------|---------|
| 49 | first  | 81   | neg-neg |
| 49 | second |      |         |
| 50 | first  | 143  | neg-neg |
| 50 | second |      |         |
| M  | first  | 16   | pos-neg |
| M  | second | 29   | neg-neg |
| M  | third  |      |         |
| 51 | first  | 68   | neg-neg |
| 51 | second |      |         |
| 52 | first  | 35   | pos-pos |
| 52 | second |      |         |
| 53 | first  | 95   | neg-neg |
| 53 | second |      |         |
| 54 | first  | 21   | neg-neg |
| 54 | second |      |         |
| F  | first  | 35   | neg-neg |
| F  | second | 110  | neg-pos |
| F  | third  |      |         |
| 55 | first  | 54   | neg-pos |
| 55 | second |      |         |
| 56 | first  | 84   | neg-neg |
| 56 | second |      |         |
| 57 | first  | 1810 | neg-neg |
| 57 | second |      |         |
| 58 | first  | 1227 | neg-neg |
| 58 | second |      |         |
| 59 | first  | 703  | neg-neg |
| 59 | second |      |         |
| 60 | first  | 1093 | neg-pos |
| 60 | second |      |         |
| 61 | first  | 1522 | pos-pos |
| 61 | second |      |         |
| 62 | first  | 2105 | pos-neg |
| 62 | second |      |         |
| 63 | first  | 192  | neg-pos |
| 63 | second |      |         |
| 64 | first  | 286  | neg-neg |
| 64 | second |      |         |
| 65 | first  | 1712 | pos-pos |
| 65 | second |      |         |
| 66 | first  | 1026 | pos-neg |
| 66 | second |      |         |
| N  | first  | 143  | pos-neg |
| N  | second | 38   | neg-neg |
| N  | third  |      |         |
| 67 | first  | 124  | neg-neg |
| 67 | second |      |         |

|    |        |     |         |
|----|--------|-----|---------|
| 68 | first  | 106 | neg-pos |
| 68 | second |     |         |
| 69 | first  | 120 | neg-pos |
| 69 | second |     |         |
| 70 | first  | 5   | neg-neg |
| 70 | second |     |         |
| 71 | first  | 755 | neg-neg |
| 71 | second |     |         |
| 72 | first  | 41  | neg-neg |
| 72 | second |     |         |
| 73 | first  | 64  | pos-pos |
| 73 | second |     |         |
| 74 | first  | 129 | neg-neg |
| 74 | second |     |         |
| 75 | first  | 189 | neg-neg |
| 75 | second |     |         |
| G  | first  | 20  | neg-neg |
| G  | second | 5   | neg-pos |
| G  | third  |     |         |
| O  | first  | 27  | pos-neg |
| O  | second | 35  | neg-neg |
| O  | third  | 41  | neg-neg |
| O  | fourth |     |         |
| 76 | first  | 10  | neg-pos |
| 76 | second |     |         |

RT-PCR: Sapovirus RNA infection status: positive (Pos), negative (Neg). Individuals A-O the same animals listed in Table 2. Individuals numbered 1-76 were only sampled on two occasions and are not included in Table 2.
